# Supplementary material for: Survey and Sequence Characterization of Bovine Mastitis-Associated Escherichia coli in Dairy Herds
Source: Front Vet Sci. 2020 Dec 7;7:582297. doi: 10.3389/fvets.2020.582297 (PMC7750360; doi:10.3389/fvets.2020.582297)
Supplement: Supplementary file 2 [file Data_Sheet_2.XLSX]

## Sheet: Plas_hit_table
Isolation location	Farm (for paper)	Source	Isolate/Like-plasmid	pB171	F-plasmid-K12	p2457TS2	pRK100	pColG	MccC7-H22	pBS512_7	pVir68	pAm08CD9902	pPAB19-3	pSH146_87	pO145-13514	pSTY1	p1303_109	p1303_5	pECC-1470_100	pSYM6	pKUSR18	pYU39_89	pCFSAN029787_02	F-plasmid-NCM3722	pSA02DT10168701_37	p12-4374_62	pCFSAN004177G_03	pCFSAN004177P_01	pC3-A	pM11-A	pM11-B	pSAN2-1677	pECAZ146_5	pEC-AR_0162	pABWA45_1	pABWA45_4	pSE-SA20035215	pOX38-Gen	pNDM4_WCHEC96200	Total plasmids per isolate
Victoria	VICT1	GRIB	1	1	1	1	1	0	0	0	0	0	0	0	0	0	0	0	0	0	0	0	0	0	0	0	0	0	0	0	0	0	0	0	0	0	0	0	0	4
Victoria	VICT2	GRIB	2	0	0	0	0	1	1	1	0	0	0	0	0	0	0	0	0	0	0	0	0	0	0	0	0	0	0	0	0	0	0	0	0	0	0	0	0	3
Victoria	VICT3	GRIB	3	0	0	1	0	0	0	0	1	1	1	0	0	0	0	0	0	0	0	0	0	0	0	0	0	0	0	0	0	0	0	0	0	0	0	0	0	4
Victoria	VICT4	GRIB	4	0	1	1	1	0	0	0	0	0	0	1	0	0	0	0	0	0	0	0	0	0	0	0	0	0	0	0	0	0	0	0	0	0	0	0	0	4
Victoria	VICT5	GRIB	5	0	1	1	1	0	0	0	0	0	0	1	0	0	0	0	0	0	0	0	0	0	0	0	0	0	0	0	0	0	0	0	0	0	0	0	0	4
Queensland	SQLD2	BSL	6	0	0	0	0	0	0	1	0	0	0	0	1	1	0	0	0	0	0	0	0	0	0	0	0	0	0	0	0	0	0	0	0	0	0	0	0	3
Queensland	SQLD3	BSL	7	0	0	0	0	0	0	0	0	0	0	0	0	0	1	0	0	0	0	0	0	0	0	0	0	0	0	0	0	0	0	0	0	0	0	0	0	1
Queensland	SQLD4	BSL	8	0	0	0	0	0	0	0	0	0	0	0	0	0	0	1	1	1	1	0	0	0	0	0	0	0	0	0	0	0	0	0	0	0	0	0	0	4
Queensland	SQLD5	BSL	9	0	0	0	0	0	0	0	0	0	0	0	0	0	0	0	0	0	0	0	0	0	0	0	0	0	0	0	0	0	0	0	0	0	0	0	0	0
Queensland	SQLD6	BSL	10	0	0	1	0	0	0	0	0	0	0	0	0	0	0	0	0	0	0	1	0	0	0	0	0	0	0	0	0	0	0	0	0	0	0	0	0	2
Queensland	NQLD1	LS	19A	0	0	0	0	0	0	0	0	0	0	0	0	0	0	0	0	0	0	0	1	0	0	0	0	0	0	0	0	0	0	0	0	0	0	0	0	1
Queensland	NQLD1	LS	20A	0	0	0	0	0	0	0	0	0	0	0	0	0	0	1	0	0	0	0	0	1	1	1	0	0	0	0	0	0	0	0	0	0	0	0	0	4
Queensland	NQLD1	LS	20B	0	0	0	0	0	0	0	0	0	0	0	0	0	0	1	0	0	0	0	0	1	1	1	0	0	0	0	0	0	0	0	0	0	0	0	0	4
Queensland	NQLD1	LS	21A	0	0	1	0	0	0	0	0	0	0	0	0	0	0	0	0	0	0	0	0	0	0	0	0	0	0	0	0	0	0	0	0	0	0	0	0	1
Queensland	NQLD1	LS	21B	0	0	1	0	0	0	0	0	0	0	0	0	0	0	0	0	0	0	0	0	0	0	0	0	0	0	0	0	0	0	0	0	0	0	0	0	1
Victoria	VICT6	JKB	46B	0	0	0	0	0	0	0	0	0	0	0	0	0	0	0	0	0	0	0	0	0	0	0	1	1	1	0	0	0	0	0	0	0	0	0	0	3
Victoria	VICT6	JKB	55B	0	0	0	0	0	0	0	0	0	0	0	0	0	0	0	0	0	0	0	0	0	0	0	1	1	1	0	0	0	0	0	0	0	0	0	0	3
Victoria	VICT6	JKB	55C	0	0	0	0	0	0	0	0	0	0	0	0	0	0	0	0	0	0	0	0	0	0	0	1	1	1	0	0	0	0	0	0	0	0	0	0	3
Victoria	VICT7	JK	69C	0	0	0	0	0	0	0	0	0	0	0	0	0	0	0	0	0	0	0	0	0	0	0	0	0	0	1	1	1	1	1	0	0	0	0	0	5
Victoria	VICT8	CN	77C	0	0	1	0	0	0	0	0	0	0	0	0	0	0	0	1	0	0	0	0	0	1	0	0	0	0	0	0	0	0	0	1	0	0	0	0	4
Queensland	SQLD7	MC	111A	0	0	0	0	0	0	0	0	0	0	0	0	0	0	0	0	0	0	0	0	0	1	0	0	0	0	0	0	0	0	0	0	1	0	0	0	2
Queensland	SQLD7	MC	111B	0	0	0	0	0	0	0	0	0	0	0	0	0	0	0	0	0	0	0	0	0	1	0	0	0	0	0	0	0	0	0	0	1	0	0	0	2
Queensland	SQLD7	MC	115C	0	0	0	0	0	0	0	0	0	0	0	0	0	0	0	0	0	0	0	0	0	1	1	0	0	0	0	0	0	0	0	0	0	1	1	0	4
Queensland	SQLD8	MW	143B	0	0	0	0	0	0	0	0	0	0	0	0	0	0	0	0	0	0	0	0	0	0	0	0	0	0	0	0	0	0	0	0	0	0	0	1	1
																																								Total plasmids
			Accession	CP012922	MF370216	CP021680	CP011418	CP012928	CP010120	EF536825	AY230888	CP011496	AY028316	CP009103	CP006028	CP019897	AP001918	KM396298	CP001162	AB024946	CP010207	CP022226	CP018986	CP011430	CP009167	CP009169	CP012494	GQ149344	JN985534	CP022158	CP010208	KM107842	CP022155	CP022495	CP001061	JX445149	DQ286390	CP012496	CP010345	36
			Counts of each plasmid	1	3	8	3	1	1	2	1	1	1	2	1	1	1	3	2	1	1	1	1	2	6	3	3	3	3	1	1	1	1	1	1	2	1	1	1	67
			Strain								Escherichia coli		Shigella flexneri 2a				Escherichia coli K-12			Escherichia coli B171
					Escherichia coli strain CA46	Escherichia coli strain H22	Shigella boydii CDC 3083-94	Escherichia coli Vir68	Escherichia coli	Escherichia coli strain M9888	Salmonella enterica subsp. enterica serovar Heidelberg	Escherichia coli O145:H28 str. RM13514	Salmonella enterica subsp. enterica serovar Typhimurium strain ATCC 13311	Escherichia coli 1303	Escherichia coli 1303	Escherichia coli ECC-1470	Escherichia coli strain G3/10	Salmonella enterica subsp. enterica serovar Enteritidis strain KUSR18	Salmonella enterica subsp. enterica strain YU39	Escherichia coli strain CFSAN029787	Escherichia coli strain NCM3722	Salmonella enterica subsp. enterica serovar Heidelberg strain SA02DT10168701	Salmonella enterica subsp. enterica serovar Heidelberg strain 12-4374	Escherichia coli strain CFSAN004177	Escherichia coli strain CFSAN004177	Escherichia coli strain C3	Escherichia coli strain M11	Escherichia coli strain M11	Salmonella enterica subsp. enterica serovar Anatum str. USDA-ARS-USMARC-1677 isolate SAN222	Escherichia coli strain Ecol_AZ146	Escherichia coli strain AR_0162	Escherichia coli strain ABWA45	Escherichia coli strain ABWA45	Salmonella enterica subsp. enterica serovar Derby strain SA20035215	Escherichia coli strain J53	Escherichia coli strain WCHEC96200

## Sheet: AMR_genes_plas
Strain	Plasmid	Accession	Contig id	Start	Stop	Strand	Gene symbol	Sequence name	Scope	Element type	Element subtype	Class	Subclass	Method	Target length	Reference sequence length	% Coverage of reference sequence	% Identity to reference sequence	Alignment length	Accession of closest sequence	Name of closest sequence	HMM id	HMM description
20A	p1303_5	KM396298	Contig_51_73.2389	143137	143607	+	dfrA5	trimethoprim-resistant dihydrofolate reductase DfrA5	core	AMR	AMR	TRIMETHOPRIM	TRIMETHOPRIM	EXACTX	157	157	100	100	157	WP_001317507.1	trimethoprim-resistant dihydrofolate reductase DfrA5	NA	NA
20A	p1303_5	KM396298	Contig_51_73.2389	143794	143964	+	qacE	quaternary ammonium compound efflux SMR transporter QacE	core	STRESS	BIOCIDE	QUATERNARY AMMONIUM	QUATERNARY AMMONIUM	PARTIAL_CONTIG_ENDX	57	110	51.82	100	57	WP_010890145.1	quaternary ammonium compound efflux SMR transporter QacE	NA	NA
20A	p1303_5	KM396298	Contig_55_63.7777	537	1394	-	blaTEM-1	class A broad-spectrum beta-lactamase TEM-1	core	AMR	AMR	BETA-LACTAM	BETA-LACTAM	ALLELEX	286	286	100	100	286	WP_000027057.1	class A broad-spectrum beta-lactamase TEM-1	NA	NA
20A	p1303_5	KM396298	Contig_71_57.8594	11	844	-	aph(6)-Id	aminoglycoside O-phosphotransferase APH(6)-Id	core	AMR	AMR	AMINOGLYCOSIDE	STREPTOMYCIN	EXACTX	278	278	100	100	278	WP_000480968.1	aminoglycoside O-phosphotransferase APH(6)-Id	NA	NA
20A	p1303_5	KM396298	Contig_71_57.8594	847	1671	-	aph(3'')-Ib	aminoglycoside O-phosphotransferase APH(3'')-Ib	core	AMR	AMR	AMINOGLYCOSIDE	STREPTOMYCIN	EXACTX	275	275	100	100	275	WP_109545041.1	aminoglycoside O-phosphotransferase APH(3'')-Ib	NA	NA
20A	p1303_5	KM396298	Contig_71_57.8594	1711	2523	-	sul2	sulfonamide-resistant dihydropteroate synthase Sul2	core	AMR	AMR	SULFONAMIDE	SULFONAMIDE	EXACTX	271	271	100	100	271	WP_001043265.1	sulfonamide-resistant dihydropteroate synthase Sul2	NA	NA
20A	p1303_5	KM396298	Contig_75_72.9409	139	951	-	aph(3')-Ia	aminoglycoside O-phosphotransferase APH(3')-Ia	core	AMR	AMR	AMINOGLYCOSIDE	KANAMYCIN	EXACTX	271	271	100	100	271	WP_000018329.1	aminoglycoside O-phosphotransferase APH(3')-Ia	NA	NA
20B	p1303_5	KM396298	Contig_56_110.797	143137	143607	+	dfrA5	trimethoprim-resistant dihydrofolate reductase DfrA5	core	AMR	AMR	TRIMETHOPRIM	TRIMETHOPRIM	EXACTX	157	157	100	100	157	WP_001317507.1	trimethoprim-resistant dihydrofolate reductase DfrA5	NA	NA
20B	p1303_5	KM396298	Contig_56_110.797	143794	143964	+	qacE	quaternary ammonium compound efflux SMR transporter QacE	core	STRESS	BIOCIDE	QUATERNARY AMMONIUM	QUATERNARY AMMONIUM	PARTIAL_CONTIG_ENDX	57	110	51.82	100	57	WP_010890145.1	quaternary ammonium compound efflux SMR transporter QacE	NA	NA
20B	p1303_5	KM396298	Contig_60_96.1294	537	1394	-	blaTEM-1	class A broad-spectrum beta-lactamase TEM-1	core	AMR	AMR	BETA-LACTAM	BETA-LACTAM	ALLELEX	286	286	100	100	286	WP_000027057.1	class A broad-spectrum beta-lactamase TEM-1	NA	NA
20B	p1303_5	KM396298	Contig_69_89.8651	11	844	-	aph(6)-Id	aminoglycoside O-phosphotransferase APH(6)-Id	core	AMR	AMR	AMINOGLYCOSIDE	STREPTOMYCIN	EXACTX	278	278	100	100	278	WP_000480968.1	aminoglycoside O-phosphotransferase APH(6)-Id	NA	NA
20B	p1303_5	KM396298	Contig_69_89.8651	847	1671	-	aph(3'')-Ib	aminoglycoside O-phosphotransferase APH(3'')-Ib	core	AMR	AMR	AMINOGLYCOSIDE	STREPTOMYCIN	EXACTX	275	275	100	100	275	WP_109545041.1	aminoglycoside O-phosphotransferase APH(3'')-Ib	NA	NA
20B	p1303_5	KM396298	Contig_69_89.8651	1711	2523	-	sul2	sulfonamide-resistant dihydropteroate synthase Sul2	core	AMR	AMR	SULFONAMIDE	SULFONAMIDE	EXACTX	271	271	100	100	271	WP_001043265.1	sulfonamide-resistant dihydropteroate synthase Sul2	NA	NA
20B	p1303_5	KM396298	Contig_73_101.541	139	951	-	aph(3')-Ia	aminoglycoside O-phosphotransferase APH(3')-Ia	core	AMR	AMR	AMINOGLYCOSIDE	KANAMYCIN	EXACTX	271	271	100	100	271	WP_000018329.1	aminoglycoside O-phosphotransferase APH(3')-Ia	NA	NA
46B	pCFSAN004177P_01	GQ149344	Contig_33_68.2384	1451	2647	-	tet(A)	tetracycline efflux MFS transporter Tet(A)	core	AMR	AMR	TETRACYCLINE	TETRACYCLINE	EXACTX	399	399	100	100	399	WP_000804064.1	tetracycline efflux MFS transporter Tet(A)	NA	NA
55B	pCFSAN004177P_01	GQ149344	Contig_38_65.084	1451	2647	-	tet(A)	tetracycline efflux MFS transporter Tet(A)	core	AMR	AMR	TETRACYCLINE	TETRACYCLINE	EXACTX	399	399	100	100	399	WP_000804064.1	tetracycline efflux MFS transporter Tet(A)	NA	NA
55C	pCFSAN004177P_01	GQ149344	Contig_36_65.414	1451	2647	-	tet(A)	tetracycline efflux MFS transporter Tet(A)	core	AMR	AMR	TETRACYCLINE	TETRACYCLINE	EXACTX	399	399	100	100	399	WP_000804064.1	tetracycline efflux MFS transporter Tet(A)	NA	NA
	Summary
Isolate	Plasmid	Gene symbol	Subclass
20A	p1303_5	dfrA5	TRIMETHOPRIM
20A	p1303_5	qacE	QUATERNARY AMMONIUM
20A	p1303_5	blaTEM-1	BETA-LACTAM
20A	p1303_5	aph(6)-Id	STREPTOMYCIN
20A	p1303_5	aph(3'')-Ib	STREPTOMYCIN
20A	p1303_5	sul2	SULFONAMIDE
20A	p1303_5	aph(3')-Ia	KANAMYCIN
20B	p1303_5	dfrA5	TRIMETHOPRIM
20B	p1303_5	qacE	QUATERNARY AMMONIUM
20B	p1303_5	blaTEM-1	BETA-LACTAM
20B	p1303_5	aph(6)-Id	STREPTOMYCIN
20B	p1303_5	aph(3'')-Ib	STREPTOMYCIN
20B	p1303_5	sul2	SULFONAMIDE
20B	p1303_5	aph(3')-Ia	KANAMYCIN
46B	pCFSAN004177P_01	tet(A)	TETRACYCLINE
55B	pCFSAN004177P_01	tet(A)	TETRACYCLINE
55C	pCFSAN004177P_01	tet(A)	TETRACYCLINE

## Sheet: AMR_genes_chromosom
						Chromosomal AMR
Strain	Contig id	Start	Stop	Strand	Gene symbol	Sequence name	Scope	Element type	Element subtype	Class	Subclass	Method	Target length	Reference sequence length	% Coverage of reference sequence	% Identity to reference sequence	Alignment length	Accession of closest sequence	Name of closest sequence	HMM id	HMM description
10	Contig_43_72.6064	125918	127048	+	blaEC	BlaEC family class C beta-lactamase	core	AMR	AMR	BETA-LACTAM	BETA-LACTAM	EXACTX	377	377	100	100	377	WP_001336292.1	BlaEC family class C beta-lactamase	NA	NA
11A	Contig_103_80.3855	153611	154741	+	blaEC	BlaEC family class C beta-lactamase	core	AMR	AMR	BETA-LACTAM	BETA-LACTAM	EXACTX	377	377	100	100	377	WP_001336292.1	BlaEC family class C beta-lactamase	NA	NA
11B	Contig_105_92.4268	153611	154741	+	blaEC	BlaEC family class C beta-lactamase	core	AMR	AMR	BETA-LACTAM	BETA-LACTAM	EXACTX	377	377	100	100	377	WP_001336292.1	BlaEC family class C beta-lactamase	NA	NA
NA	Contig_7_85.271	47092	48222	+	blaEC	BlaEC family class C beta-lactamase	core	AMR	AMR	BETA-LACTAM	BETA-LACTAM	BLASTX	377	377	100	98.41	377	WP_063610930.1	class C extended-spectrum beta-lactamase EC-15	NA	NA
143B	Contig_39_71.7571	200654	201784	+	blaEC	BlaEC family class C beta-lactamase	core	AMR	AMR	BETA-LACTAM	BETA-LACTAM	BLASTX	377	377	100	98.67	377	WP_063610930.1	class C extended-spectrum beta-lactamase EC-15	NA	NA
11	Contig_13_78.0147	48079	49209	+	blaEC	BlaEC family class C beta-lactamase	core	AMR	AMR	BETA-LACTAM	BETA-LACTAM	BLASTX	377	377	100	98.41	377	WP_063610930.1	class C extended-spectrum beta-lactamase EC-15	NA	NA
1	Contig_84_139.91	123498	124628	+	blaEC	BlaEC family class C beta-lactamase	core	AMR	AMR	BETA-LACTAM	BETA-LACTAM	BLASTX	377	377	100	98.41	377	WP_063610930.1	class C extended-spectrum beta-lactamase EC-15	NA	NA
20A	Contig_49_68.5319	125752	126882	+	blaEC	BlaEC family class C beta-lactamase	core	AMR	AMR	BETA-LACTAM	BETA-LACTAM	EXACTX	377	377	100	100	377	WP_001336292.1	BlaEC family class C beta-lactamase	NA	NA
20B	Contig_64_103.148	221308	222438	+	blaEC	BlaEC family class C beta-lactamase	core	AMR	AMR	BETA-LACTAM	BETA-LACTAM	EXACTX	377	377	100	100	377	WP_001336292.1	BlaEC family class C beta-lactamase	NA	NA
21A	Contig_7_105.403	160025	161155	-	blaEC	BlaEC family class C beta-lactamase	core	AMR	AMR	BETA-LACTAM	BETA-LACTAM	BLASTX	377	377	100	97.35	377	WP_063860454.1	cephalosporin-hydrolyzing class C beta-lactamase EC-8	NA	NA
21B	Contig_6_86.7425	160025	161155	-	blaEC	BlaEC family class C beta-lactamase	core	AMR	AMR	BETA-LACTAM	BETA-LACTAM	BLASTX	377	377	100	97.35	377	WP_063860454.1	cephalosporin-hydrolyzing class C beta-lactamase EC-8	NA	NA
2	Contig_29_94.803	48578	49708	+	blaEC	BlaEC family class C beta-lactamase	core	AMR	AMR	BETA-LACTAM	BETA-LACTAM	BLASTX	377	377	100	98.67	377	WP_063610930.1	class C extended-spectrum beta-lactamase EC-15	NA	NA
3	Contig_55_81.1402	128707	129837	+	blaEC	BlaEC family class C beta-lactamase	core	AMR	AMR	BETA-LACTAM	BETA-LACTAM	EXACTX	377	377	100	100	377	WP_001336292.1	BlaEC family class C beta-lactamase	NA	NA
46B	Contig_29_73.77	136783	137913	+	blaEC	BlaEC family class C beta-lactamase	core	AMR	AMR	BETA-LACTAM	BETA-LACTAM	BLASTX	377	377	100	98.41	377	WP_063610930.1	class C extended-spectrum beta-lactamase EC-15	NA	NA
4	Contig_31_66.5839	139150	140280	+	blaEC	BlaEC family class C beta-lactamase	core	AMR	AMR	BETA-LACTAM	BETA-LACTAM	EXACTX	377	377	100	100	377	WP_001336292.1	BlaEC family class C beta-lactamase	NA	NA
55B	Contig_33_68.5439	136783	137913	+	blaEC	BlaEC family class C beta-lactamase	core	AMR	AMR	BETA-LACTAM	BETA-LACTAM	BLASTX	377	377	100	98.41	377	WP_063610930.1	class C extended-spectrum beta-lactamase EC-15	NA	NA
55C	Contig_32_70.009	136783	137913	+	blaEC	BlaEC family class C beta-lactamase	core	AMR	AMR	BETA-LACTAM	BETA-LACTAM	BLASTX	377	377	100	98.41	377	WP_063610930.1	class C extended-spectrum beta-lactamase EC-15	NA	NA
5	Contig_30_92.5509	139150	140280	+	blaEC	BlaEC family class C beta-lactamase	core	AMR	AMR	BETA-LACTAM	BETA-LACTAM	EXACTX	377	377	100	100	377	WP_001336292.1	BlaEC family class C beta-lactamase	NA	NA
69C	Contig_253_57.462	54044	55174	+	blaEC	BlaEC family class C beta-lactamase	core	AMR	AMR	BETA-LACTAM	BETA-LACTAM	BLASTX	377	377	100	97.88	377	WP_063610930.1	class C extended-spectrum beta-lactamase EC-15	NA	NA
6	Contig_231_74.481	83326	84456	+	blaEC	BlaEC family class C beta-lactamase	core	AMR	AMR	BETA-LACTAM	BETA-LACTAM	BLASTX	377	377	100	98.67	377	WP_063610930.1	class C extended-spectrum beta-lactamase EC-15	NA	NA
77C	Contig_24_61.7203	128753	129883	+	blaEC	BlaEC family class C beta-lactamase	core	AMR	AMR	BETA-LACTAM	BETA-LACTAM	BLASTX	377	377	100	98.41	377	WP_063610930.1	class C extended-spectrum beta-lactamase EC-15	NA	NA
7	Contig_5_98.8816	47692	48822	+	blaEC	BlaEC family class C beta-lactamase	core	AMR	AMR	BETA-LACTAM	BETA-LACTAM	BLASTX	377	377	100	97.88	377	WP_063860256.1	class C extended-spectrum beta-lactamase EC-18	NA	NA
8	Contig_79_75.8559	50255	51385	+	blaEC	BlaEC family class C beta-lactamase	core	AMR	AMR	BETA-LACTAM	BETA-LACTAM	BLASTX	377	377	100	99.2	377	WP_063610930.1	class C extended-spectrum beta-lactamase EC-15	NA	NA
9	Contig_83_83.797	49330	50460	+	blaEC	BlaEC family class C beta-lactamase	core	AMR	AMR	BETA-LACTAM	BETA-LACTAM	EXACTX	377	377	100	100	377	WP_001336292.1	BlaEC family class C beta-lactamase	NA	NA

## Sheet: Mobilisable_summary
Strain and plas designation	like plasmid	Predicted mobility	Accession number of closest mash hit			Isolate	Conjugative plasmid/s	Mobilizable plasmid/s	Mobilizable plasmids transferrable
8_plasmid_novel_0	pSYM6	None	AB024946			1	pB171; F-plasmid-K12	No	No
7_plasmid_541	p1303_109	Conjugative	AP001918			2	pColG	pBS512_7	Yes
3_plasmid_2	pPAB19-3	Mobilizable	AY028316			3	pAm08CD9902	pPAB19-3	Yes
3_plasmid_novel_0	pVir68	None	AY230888			4	F-plasmid-K12; pSH146_87	No	No
77C_plasmid_276	pABWA45_1	Mobilizable	CP001061			5	pSH146_87; F-plasmid-K12	No	No
77C_plasmid_novel_1	pECC-1470_100	None	CP001162			6	No	pO145-13514; pSTY1; pBS512_7	No
6_plasmid_1557	pO145-13514	Mobilizable	CP006028			7	AP001918	No	No
4_plasmid_44	pSH146_87	Conjugative	CP009103			8	p1303_5	pKUSR18	Yes
111A_plasmid_541	pSA02DT10168701_37	Conjugative	CP009167			9	No	No	No
115C_plasmid_18	p12-4374_62	None	CP009169			10	No	No	No
2_plasmid_novel_0	MccC7-H22	None	CP010120			111A	pABWA45_4; pSA02DT10168701_37	No	No
8_plasmid_novel_1	pKUSR18	Mobilizable	CP010207			111B	pABWA45_4; pSA02DT10168701_37	No	No
69C_plasmid_2912	pM11-B	None	CP010208			115C	pSA02DT10168701_37	pSE-SA20035215	Yes
143B_plasmid_541	pNDM4_WCHEC96200	None	CP010345			143B	No	No	No
1_plasmid_novel_0	pRK100	None	CP011418			19A	No	pCFSAN029787_02	No
20A_plasmid_1140	F-plasmid-NCM3722	None	CP011430			20A	p1303_5	p12-4374_62	Yes
3_plasmid_novel_1	pAm08CD9902	Conjugative	CP011496			20B	p1303_5	p12-4374_62	Yes
46B_plasmid_1009	pCFSAN004177G_03	Mobilizable	CP012494			21A	No	No	No
115C_plasmid_novel_0	pOX38-Gen	None	CP012496			21B	No	No	No
1_plasmid_53	pB171	Conjugative	CP012922			46B	No	pCFSAN004177G_03; pC3-A	No
2_plasmid_529	pColG	Conjugative	CP012928			55B	No	pCFSAN004177G_03; pC3-A	No
19A_plasmid_507	pCFSAN029787_02	Mobilizable	CP018986			55C	No	pCFSAN004177G_03; pC3-A	No
6_plasmid_novel_0	pSTY1	Mobilizable	CP019897			69C	pM11-A; pEC-AR_0162	No	No
1_plasmid_1068	p2457TS2	None	CP021680			77C	pSA02DT10168701_37	pABWA45_1	Yes
69C_plasmid_772	pECAZ146_5	None	CP022155
69C_plasmid_363	pM11-A	Conjugative	CP022158
10_plasmid_novel_1	pYU39_89	None	CP022226
69C_plasmid_841	pEC-AR_0162	Conjugative	CP022495
115C_plasmid_33	pSE-SA20035215	Mobilizable	DQ286390
2_plasmid_novel_1	pBS512_7	Mobilizable	EF536825
46B_plasmid_695	pCFSAN004177P_01	None	GQ149344
46B_plasmid_novel_0	pC3-A	Mobilizable	JN985534
111A_plasmid_476	pABWA45_4	Conjugative	JX445149
69C_plasmid_2987	pSAN2-1677	None	KM107842
20A_plasmid_430	p1303_5	Conjugative	KM396298
1_plasmid_542	F-plasmid-K12	Conjugative	MF370216

## Sheet: Plas_virulence
Summary table						Hit/miss table
Closest -like plasmid	Genes	Number of virulence genes	Accession of -like plasmid		Closest -like plasmid	Number of virulence genes	cnf1	espP	f17d-A	f17d-D	f17d-G	faeC	faeD	faeE	faeF	faeH	faeI	gspC	gspD	gspE	gspF	gspG	gspH	gspI	gspJ	gspK	gspL	gspM	hlyA	hlyB	hlyC	hlyD	toxB	fecI	fecR	fecA	fecB	fecD	fecE	yjhV|
pKUSR18	gspCDEFGHIJKLM	11	CP010207		pKUSR18	11	.	.	.	.	.	.	.	.	.	.	.	100	100	100	100	100	100	100	100	100	100	100	.	.	.	.	.	.	.	.	.	.	.	.
p2457TS2	fecIRABDE; yjhV	7	CP021680		p2457TS2-77C variant	11	.	.	.	.	.	.	.	.	.	.	.	.	.	.	.	.	.	.	.	.	.	.	100	100	90.96	100	.	100	100	100	100	100	100	100
F-plasmid-K12	faeCDEFHI	6	MF370216		p2457TS2	7	.	.	.	.	.	.	.	.	.	.	.	.	.	.	.	.	.	.	.	.	.	.	.	.	.	.	.	100	100	100	100	100	100	100
pO145-13514	hlyABCD; espP; toxB	6	CP006028		F-plasmid-K12	6	.	.	.	.	.	88.83	95.98	93.05	99.19	92.48	100	.	.	.	.	.	.	.	.	.	.	.	.	.	.	.	.	.	.	.	.	.	.	.
pECC-1470_100	hylC; f17d-ADG; cnf1	5	CP001162		pO145-13514	6	.	100	.	.	.	.	.	.	.	.	.	.	.	.	.	.	.	.	.	.	.	.	100	100	100	100	99.7	.	.	.	.	.	.	.
pSA02DT10168701_37	hlyABCD	4	CP009167		pECC-1470_100	5	99.7	.	99.82	100	99.71	.	.	.	.	.	.	.	.	.	.	.	.	.	.	.	.	.	.	.	97.48	.	.	.	.	.	.	.	.	.

## Sheet: plas_virul_total_hit-miss
#FILE	NUM_FOUND	cnf1	espP	f17d-A	f17d-D	f17d-G	faeC	faeD	faeE	faeF	faeH	faeI	gspC	gspD	gspE	gspF	gspG	gspH	gspI	gspJ	gspK	gspL	gspM	hlyA	hlyB	hlyC	hlyD	toxB
1_plasmid_542.fasta	6	.	.	.	.	.	88.83	95.98	93.05	99.19	92.48	100	.	.	.	.	.	.	.	.	.	.	.	.	.	.	.	.
6_plasmid_1557.fasta	6	.	100	.	.	.	.	.	.	.	.	.	.	.	.	.	.	.	.	.	.	.	.	100	100	100	100	99.7
77C_plasmid_novel_0.fasta	4	.	.	.	.	.	.	.	.	.	.	.	.	.	.	.	.	.	.	.	.	.	.	100	100	90.96	100	.
8_plasmid_541.fasta	5	99.7	.	99.82	100	99.71	.	.	.	.	.	.	.	.	.	.	.	.	.	.	.	.	.	.	.	97.48	.	.
8_plasmid_novel_1.fasta	11	.	.	.	.	.	.	.	.	.	.	.	100	100	100	100	100	100	100	100	100	100	100	.	.	.	.	.

## Sheet: contig_full_report
file_id	cluster_id	contig_id	contig_length	circularity_status	rep_type	rep_type_accession	relaxase_type	relaxase_type_accession	mash_nearest_neighbor	mash_neighbor_distance	repetitive_dna_id	match_type	score	contig_match_start	contig_match_end
3	2	Contig_1_834.673_Circ	3173	Incomplete	ColRNAI_rep_cluster_1987	000019__CP000651_00005			AY028316	0.00989629
115C	18	Contig_1_680.881_Circ	4639	Incomplete	ColRNAI_rep_cluster_1857	000008__AJ627566			CP009169	0.0195632
20A	18	Contig_1_783.857_Circ	4707	Incomplete	ColRNAI_rep_cluster_1857	000008__AJ627566			CP009169	0.000458924
20B	18	Contig_1_1171.63_Circ	4707	Incomplete	ColRNAI_rep_cluster_1857	000008__AJ627566			CP009169	0.000458924
115C	33	Contig_2_1038.99_Circ	4715	Incomplete	ColRNAI_rep_cluster_1857	000008__AJ627566			DQ286390	0.00121124
4	44	Contig_1_124.975_Circ	36190	Incomplete	IncX1	000216__CP009767_00121	MOBP	NC_019096_00001	CP009103	0.0169536
5	44	Contig_1_172.739_Circ	36190	Incomplete	IncX1	000216__CP009767_00121	MOBP	NC_019096_00001	CP009103	0.0169536
1	53	Contig_51_336.48	38446	Incomplete	IncX1	000215__KC853434_00019	MOBP	NC_019096_00001	CP012922	0.0117112
77C	276	Contig_1_411.498_Circ	4526	Incomplete	ColRNAI_rep_cluster_1857	000008__AJ627566	MOBP	NC_022662_00003	CP001061	0.0489202
77C	276	Contig_2_213.279_Circ	7197	Incomplete	ColRNAI_rep_cluster_1857	000008__AJ627566	MOBP	NC_019076_00002	CP001061	0.0489202
69C	363	Contig_68_162.102	1298	Incomplete					CP022158	0.0161637	AJ010745	IS110	2386	49	1347
69C	363	Contig_234_149.568	41342	Incomplete	IncX5	000226__MF062700	MOBP	NC_019096_00001	CP022158	0.0161637
20A	430	Contig_46_116.761	13151	Incomplete					KM396298	0.0129677
20A	430	Contig_19_117.351	37333	Incomplete			MOBF	NC_017627_00068	KM396298	0.0129677
20A	430	Contig_55_63.7777	1914	Incomplete					KM396298	0.0129677	HM769901	Tn3	2739	1	1528
20A	430	Contig_71_57.8594	4387	Incomplete	IncQ1	000195__NC_013728_00014			KM396298	0.0129677
20A	430	Contig_75_72.9409	1036	Incomplete					KM396298	0.0129677
20A	430	Contig_56_162.854	1278	Incomplete					KM396298	0.0129677	JN412066	IS3	1009	28	1296
20A	430	Contig_25_264.413	1010	Incomplete					KM396298	0.0129677	M11300	IS4	1836	308	1315
20A	430	Contig_36_273.133	1401	Incomplete					KM396298	0.0129677	EF382672	IS3	2167	22	1422
20A	430	Contig_51_73.2389	143964	Incomplete	IncH,rep_cluster_1088	000139__NC_012555_00001,000340__KU353730			KM396298	0.0129677
20A	430	Contig_24_69.7843	66391	Incomplete			MOBH	NC_012555_00231	KM396298	0.0129677
20B	430	Contig_52_179.073	13151	Incomplete					KM396298	0.0129677
20B	430	Contig_19_180.52	37333	Incomplete			MOBF	NC_017627_00068	KM396298	0.0129677
20B	430	Contig_60_96.1294	1914	Incomplete					KM396298	0.0129677	HM769901	Tn3	2739	1	1528
20B	430	Contig_69_89.8651	4387	Incomplete	IncQ1	000195__NC_013728_00014			KM396298	0.0129677
20B	430	Contig_73_101.541	1036	Incomplete					KM396298	0.0129677
20B	430	Contig_61_275.914	1278	Incomplete					KM396298	0.0129677	JN412066	IS3	1009	28	1296
20B	430	Contig_26_405.824	1010	Incomplete					KM396298	0.0129677	M11300	IS4	1836	308	1315
20B	430	Contig_40_429.871	1401	Incomplete					KM396298	0.0129677	EF382672	IS3	2167	22	1422
20B	430	Contig_56_110.797	143964	Incomplete	IncH,rep_cluster_1088	000139__NC_012555_00001,000340__KU353730			KM396298	0.0129677
20B	430	Contig_25_104.583	66391	Incomplete			MOBH	NC_012555_00231	KM396298	0.0129677
8	430	Contig_23_176.247	61788	Incomplete			MOBF	NC_017627_00068	KM396298	0.0143027
8	430	Contig_76_193.284	1109	Incomplete					KM396298	0.0143027		IS66	1103	912	1911
8	430	Contig_68_86.6741	78928	Incomplete	IncH,rep_cluster_1088	000139__NC_012555_00001,000340__KU353730			KM396298	0.0143027
8	430	Contig_33_80.2909	21514	Incomplete					KM396298	0.0143027
8	430	Contig_11_79.5363	21589	Incomplete					KM396298	0.0143027
8	430	Contig_78_76.4568	83475	Incomplete			MOBH	NC_012555_00231	KM396298	0.0143027
111A	476	Contig_6_183.773	19618	Incomplete	IncI1	000145__HE610900_00001			JX445149	0.0131603
111A	476	Contig_106_166.28	71648	Incomplete			MOBP	NC_019097	JX445149	0.0131603
111A	476	Contig_77_254.537	1291	Incomplete					JX445149	0.0131603	M11300	IS4	2355	27	1315
111A	476	Contig_61_335.84	1401	Incomplete					JX445149	0.0131603	EF382672	IS3	2167	22	1422
111B	476	Contig_7_203.887	19618	Incomplete	IncI1	000145__HE610900_00001			JX445149	0.0134525
111B	476	Contig_95_209.68	23267	Incomplete					JX445149	0.0134525
111B	476	Contig_1_177.415_Circ	6349	Incomplete					JX445149	0.0134525
111B	476	Contig_110_179.912	41850	Incomplete			MOBP	NC_019097	JX445149	0.0134525
111B	476	Contig_106_270.09	1030	Incomplete					JX445149	0.0134525	NC_014312	IS66	1177	1311	2340
111B	476	Contig_76_294.189	1291	Incomplete					JX445149	0.0134525	M11300	IS4	2355	27	1315
111B	476	Contig_62_382.118	1401	Incomplete					JX445149	0.0134525	EF382672	IS3	2167	22	1422
19A	507	Contig_1_854.408_Circ	6075	Incomplete	ColRNAI_rep_cluster_1291	000001__EU090225_00001	MOBQ	NC_019783_00003	CP018986	0.00115999
2	529	Contig_78_217.675	48262	Incomplete			MOBF	NC_017627_00068	CP012928	0.0276006
2	529	Contig_62_264.144	2394	Incomplete	IncFIB	000095__NZ_CP014273_00094			CP012928	0.0276006
2	529	Contig_72_261.135	12752	Incomplete	IncFIA	000094__NZ_CP015070_00117	MOBF	NC_011980_00044	CP012928	0.0276006
2	529	Contig_107_273.856	2346	Incomplete	IncFII,IncFIIA	000121__CP024805,000136__AP014877_00014			CP012928	0.0276006
111A	541	Contig_41_135.839	38656	Incomplete					CP009167	0.0109136
111A	541	Contig_97_139.617	21708	Incomplete	IncFIIA,IncFII	000136__AP014877_00014,000121__CP024805	MOBF	NC_017627_00068	CP009167	0.0109136
111A	541	Contig_85_188.598	9618	Incomplete					CP009167	0.0109136
111A	541	Contig_40_138.804	12480	Incomplete	IncFIB	000096__NC_019117_00097			CP009167	0.0109136
111A	541	Contig_50_148.363	15137	Incomplete	IncFIA	000094__NZ_CP015070_00117			CP009167	0.0109136
111B	541	Contig_29_156.144	38670	Incomplete					CP009167	0.0109136
111B	541	Contig_96_163.1	21708	Incomplete	IncFIIA,IncFII	000136__AP014877_00014,000121__CP024805	MOBF	NC_017627_00068	CP009167	0.0109136
111B	541	Contig_83_199.59	9392	Incomplete					CP009167	0.0109136
111B	541	Contig_98_166.616	6746	Incomplete					CP009167	0.0109136
111B	541	Contig_43_149.03	5739	Incomplete	IncFIB	000096__NC_019117_00097			CP009167	0.0109136
111B	541	Contig_59_176.455	15213	Incomplete	IncFIA	000094__NZ_CP015070_00117			CP009167	0.0109136
115C	541	Contig_8_113.691	46973	Incomplete			MOBF	NC_017627_00068	CP009167	0.00741321
115C	541	Contig_63_178.641	2175	Incomplete					CP009167	0.00741321	NC_014312	IS66	1938	373	2207
115C	541	Contig_19_176.428	6407	Incomplete					CP009167	0.00741321
115C	541	Contig_52_160.651	1940	Incomplete					CP009167	0.00741321
115C	541	Contig_68_223.251	1081	Incomplete					CP009167	0.00741321
115C	541	Contig_79_126.766	12929	Incomplete	IncFIB	000095__NZ_CP014273_00094			CP009167	0.00741321
115C	541	Contig_3_138.699	17936	Incomplete					CP009167	0.00741321
115C	541	Contig_73_130.105	1369	Incomplete					CP009167	0.00741321
115C	541	Contig_36_140.204	13720	Incomplete	IncFIA	000094__NZ_CP015070_00117			CP009167	0.00741321
143B	541	Contig_10_119.647	27259	Incomplete	IncFII,IncFIIA	000121__CP024805,000136__AP014877_00014			CP010345	0.0239829
143B	541	Contig_23_138.907	6604	Incomplete					CP010345	0.0239829
143B	541	Contig_48_124.657	25211	Incomplete	IncFIB	000095__NZ_CP014273_00094			CP010345	0.0239829
20A	541	Contig_72_144.709	31418	Incomplete	IncFII,IncFIIA	000121__CP024805,000136__AP014877_00014			CP009167	0.0246043
20A	541	Contig_57_130.481	3765	Incomplete					CP009167	0.0246043
20A	541	Contig_9_126.039	13361	Incomplete	IncFIB	000095__NZ_CP014273_00094			CP009167	0.0246043
20A	541	Contig_10_141.528	15057	Incomplete	IncFIA	000094__NZ_CP015070_00117			CP009167	0.0246043
20B	541	Contig_70_221.77	31418	Incomplete	IncFII,IncFIIA	000121__CP024805,000136__AP014877_00014			CP009167	0.0246043
20B	541	Contig_62_207.648	3765	Incomplete					CP009167	0.0246043
20B	541	Contig_10_193.57	13361	Incomplete	IncFIB	000095__NZ_CP014273_00094			CP009167	0.0246043
20B	541	Contig_37_214.357	15053	Incomplete	IncFIA	000094__NZ_CP015070_00117			CP009167	0.0246043
7	541	Contig_70_142.815	20992	Incomplete					AP001918	0.0163307
7	541	Contig_66_144.416	63230	Incomplete	IncFII,IncFIIA	000121__CP024805,000136__AP014877_00014	MOBF	NC_017627_00068	AP001918	0.0163307
7	541	Contig_22_187.487	1854	Incomplete					AP001918	0.0163307
7	541	Contig_57_144.537	17075	Incomplete	IncFIB	000095__NZ_CP014273_00094			AP001918	0.0163307
7	541	Contig_6_160.19	13953	Incomplete					AP001918	0.0163307
8	541	Contig_42_175.488	2111	Incomplete					CP001162	0.04288
8	541	Contig_1_195.673	3967	Incomplete					CP001162	0.04288
8	541	Contig_4_210.051	3198	Incomplete					CP001162	0.04288
8	541	Contig_29_270.386	2873	Incomplete					CP001162	0.04288
8	541	Contig_15_233.077	1166	Incomplete					CP001162	0.04288
8	541	Contig_59_185.441	9370	Incomplete	IncFIB	000096__NC_019117_00097			CP001162	0.04288
8	541	Contig_61_206.809	14543	Incomplete					CP001162	0.04288
8	541	Contig_48_187.953	15912	Incomplete					CP001162	0.04288
1	542	Contig_52_466.078	1912	Incomplete					MF370216	0.043179	CP009539	IS21	1986	22	1933
1	542	Contig_69_632.727	2152	Incomplete					MF370216	0.043179	NC_014312	IS66	1836	373	2242
1	542	Contig_72_330.951	60787	Incomplete	IncFII,IncFIIA	000121__CP024805,000136__AP014877_00014	MOBF	NC_017627_00068	MF370216	0.043179
4	542	Contig_33_151.986	17998	Incomplete					MF370216	0.0299949
4	542	Contig_48_132.25	36974	Incomplete	IncFIIA,IncFII	000136__AP014877_00014,000121__CP024805	MOBF	NC_017627_00068	MF370216	0.0299949
4	542	Contig_36_360.963	1087	Incomplete					MF370216	0.0299949	M11300	IS4	1978	148	1232
5	542	Contig_32_211.007	17998	Incomplete					MF370216	0.0299949
5	542	Contig_46_181.573	36974	Incomplete	IncFIIA,IncFII	000136__AP014877_00014,000121__CP024805	MOBF	NC_017627_00068	MF370216	0.0299949
5	542	Contig_27_478.312	1073	Incomplete					MF370216	0.0299949	M11300	IS4	1953	156	1226
46B	695	Contig_46_143.857	1726	Incomplete					GQ149344	0.0267335	NC_008345	Tn3	1271	3380	5044
46B	695	Contig_33_68.2384	3699	Incomplete					GQ149344	0.0267335
55B	695	Contig_55_145.81	1726	Incomplete					GQ149344	0.0267335	NC_008345	Tn3	1271	3380	5044
55B	695	Contig_38_65.084	3699	Incomplete					GQ149344	0.0267335
55C	695	Contig_36_65.414	3699	Incomplete					GQ149344	0.030875
69C	772	Contig_238_69.0329	1237	Incomplete					CP022155	0.0299949		Tn3	1221	737	1967
69C	772	Contig_189_141.463	1773	Incomplete	IncFIB	000107__CP014778_00094			CP022155	0.0299949
69C	772	Contig_249_103.187	4121	Incomplete					CP022155	0.0299949
69C	772	Contig_220_67.5488	5946	Incomplete					CP022155	0.0299949
69C	772	Contig_21_85.8839	3525	Incomplete	rep_cluster_1304	000621__CP009126_00005			CP022155	0.0299949
69C	772	Contig_260_85.062	9358	Incomplete					CP022155	0.0299949
69C	772	Contig_118_58.4536	11405	Incomplete					CP022155	0.0299949
69C	772	Contig_146_61.6346	8793	Incomplete					CP022155	0.0299949
69C	841	Contig_206_79.6227	44425	Incomplete					CP022495	0.0138985
69C	841	Contig_217_69.191	7099	Incomplete					CP022495	0.0138985
69C	841	Contig_29_67.9536	17978	Incomplete					CP022495	0.0138985
69C	841	Contig_251_106.278	1328	Incomplete					CP022495	0.0138985
69C	841	Contig_13_73.7112	13100	Incomplete			MOBH	NC_013365_00169	CP022495	0.0138985
69C	841	Contig_167_80.6549	12610	Incomplete					CP022495	0.0138985
69C	841	Contig_244_65.1586	14321	Incomplete					CP022495	0.0138985
69C	841	Contig_204_77.5633	9404	Incomplete					CP022495	0.0138985
69C	841	Contig_269_83.3546	14928	Incomplete					CP022495	0.0138985
69C	841	Contig_43_162.386	2832	Incomplete	IncFIA	000093__KX023259_00112			CP022495	0.0138985
69C	841	Contig_129_168.405	1089	Incomplete					CP022495	0.0138985	AF326767	IS630	798	40	1118
69C	841	Contig_25_139.678	1270	Incomplete					CP022495	0.0138985
69C	841	Contig_247_125.635	1279	Incomplete					CP022495	0.0138985
69C	841	Contig_127_116.231	1773	Incomplete					CP022495	0.0138985
69C	841	Contig_180_82.678	4557	Incomplete					CP022495	0.0138985
69C	841	Contig_277_128.528	1158	Incomplete					CP022495	0.0138985
69C	841	Contig_83_134.208	1665	Incomplete					CP022495	0.0138985
69C	841	Contig_155_124.809	3039	Incomplete					CP022495	0.0138985
69C	841	Contig_59_142.292	1080	Incomplete					CP022495	0.0138985
69C	841	Contig_179_75.5688	4554	Incomplete					CP022495	0.0138985
69C	841	Contig_164_114.09	1347	Incomplete					CP022495	0.0138985
69C	841	Contig_17_173.261	2195	Incomplete					CP022495	0.0138985
69C	841	Contig_171_135.902	1926	Incomplete					CP022495	0.0138985
69C	841	Contig_228_163.379	1293	Incomplete					CP022495	0.0138985
69C	841	Contig_211_72.0532	4099	Incomplete					CP022495	0.0138985
69C	841	Contig_257_101.626	3671	Incomplete					CP022495	0.0138985
69C	841	Contig_267_55.6496	3385	Incomplete					CP022495	0.0138985
46B	1009	Contig_39_168.359	1268	Incomplete			MOBP	NC_011416_00039	CP012494	0.0266484		IS3	1107	22	1289
46B	1009	Contig_30_75.8094	85035	Incomplete	IncY	000230__CP009168_00001			CP012494	0.0266484
46B	1009	Contig_6_78.0176	16916	Incomplete					CP012494	0.0266484
55B	1009	Contig_47_153.804	1268	Incomplete			MOBP	NC_011416_00039	CP012494	0.0266484		IS3	1107	22	1289
55B	1009	Contig_34_74.4444	85035	Incomplete	IncY	000230__CP009168_00001			CP012494	0.0266484
55B	1009	Contig_10_76.3703	16916	Incomplete					CP012494	0.0266484
55C	1009	Contig_45_165.871	1268	Incomplete			MOBP	NC_011416_00039	CP012494	0.0271635		IS3	1107	22	1289
55C	1009	Contig_33_74.6399	85035	Incomplete	IncY	000230__CP009168_00001			CP012494	0.0271635
55C	1009	Contig_7_82.5713	18683	Incomplete					CP012494	0.0271635
1	1068	Contig_15_130.433	20862	Incomplete					CP021680	0.0136496
21A	1068	Contig_44_101.843	4159	Incomplete					CP021680	0.0206126
21A	1068	Contig_9_103.278	13132	Incomplete					CP021680	0.0206126
21B	1068	Contig_45_84.1174	4159	Incomplete					CP021680	0.0206126
21B	1068	Contig_7_85.1927	13132	Incomplete					CP021680	0.0206126
3	1068	Contig_23_92.8763	10027	Incomplete					CP021680	0.0271635
4	1068	Contig_3_67.3579	9565	Incomplete					CP021680	0.0302852
5	1068	Contig_2_87.6928	9565	Incomplete					CP021680	0.0302852
77C	1068	Contig_52_68.2998	15368	Incomplete					CP021680	0.0319897
20A	1140	Contig_54_82.3884	86825	Incomplete	rep_cluster_1704	001113__CP011430_00070			CP011430	0.0163866
20B	1140	Contig_58_124.891	86825	Incomplete	rep_cluster_1704	001113__CP011430_00070			CP011430	0.0163866
6	1557	Contig_65_195.487	11886	Incomplete					CP006028	0.00294054
6	1557	Contig_174_195.523	2115	Incomplete	IncFIB	000095__NZ_CP014273_00094			CP006028	0.00294054
6	1557	Contig_113_482.641	1305	Incomplete			MOBP	NC_011416_00039	CP006028	0.00294054		IS3	1181	2	1306
6	1557	Contig_19_184.885	4993	Incomplete					CP006028	0.00294054
6	1557	Contig_175_187.917	6727	Incomplete					CP006028	0.00294054
6	1557	Contig_117_2038.6	1222	Incomplete					CP006028	0.00294054	NC_004851	IS3	1535	22	1098
6	1557	Contig_156_202.415	2102	Incomplete					CP006028	0.00294054
6	1557	Contig_60_208.41	22205	Incomplete	IncI1	000145__HE610900_00001			CP006028	0.00294054
6	1557	Contig_182_339.768	1512	Incomplete					CP006028	0.00294054	FJ914220	IS91	2150	52	1563
6	1557	Contig_86_167.421	17057	Incomplete			MOBP	NC_013728_00087	CP006028	0.00294054
69C	2912	Contig_281_53.9551	4047	Incomplete					CP010208	0.0447178
69C	2912	Contig_42_63.8393	24087	Incomplete					CP010208	0.0447178
69C	2987	Contig_242_447.875	1135	Incomplete					KM107842	0.0496454
69C	2987	Contig_65_184.735	4620	Incomplete					KM107842	0.0496454
69C	2987	Contig_74_206.648	1110	Incomplete					KM107842	0.0496454
69C	2987	Contig_58_141.465	9092	Incomplete					KM107842	0.0496454
1	novel_0	Contig_19_344.218	41410	Incomplete	IncFIB	000096__NC_019117_00097			CP011418	0.108487
10	novel_0	Contig_63_120.963	5031	Incomplete	IncFIB	000107__CP014778_00094			CP021680	0.0525139
10	novel_0	Contig_21_108.997	4578	Incomplete					CP021680	0.0525139
10	novel_0	Contig_109_114.065	14545	Incomplete					CP021680	0.0525139
10	novel_0	Contig_18_117.253	11875	Incomplete			MOBP	NC_011416_00039	CP021680	0.0525139
115C	novel_0	Contig_46_130.644	4213	Incomplete	IncFII,IncFIIA	000121__CP024805,000136__AP014877_00014			CP012496	0.112887
2	novel_0	Contig_106_266.458	4130	Incomplete	IncFII,IncFIIA	000121__CP024805,000136__AP014877_00014			CP010120	0.12827
3	novel_0	Contig_7_320.143	2089	Incomplete					AY230888	0.0626325		IS21	2218	61	2101
3	novel_0	Contig_85_134.333	10199	Incomplete	IncFIB	000095__NZ_CP014273_00094			AY230888	0.0626325
4	novel_0	Contig_74_165.457	12130	Incomplete	IncFIB	000095__NZ_CP014273_00094			CP011418	0.0852783
46B	novel_0	Contig_1_1377.47_Circ	3704	Incomplete	ColRNAI_rep_cluster_1987	000019__CP000651_00005			JN985534	0.0608169
5	novel_0	Contig_74_222.953	12130	Incomplete	IncFIB	000095__NZ_CP014273_00094			CP011418	0.0852783
55B	novel_0	Contig_1_1330.37_Circ	3704	Incomplete	ColRNAI_rep_cluster_1987	000019__CP000651_00005			JN985534	0.0608169
55C	novel_0	Contig_1_1453.29_Circ	3704	Incomplete	ColRNAI_rep_cluster_1987	000019__CP000651_00005			JN985534	0.0608169
6	novel_0	Contig_1_954.45_Circ	3916	Incomplete	ColRNAI_rep_cluster_1857	000008__AJ627566	MOBF	CP019897	CP019897	0.0549966
77C	novel_0	Contig_66_125.273	91573	Incomplete	IncFIB	000095__NZ_CP014273_00094	MOBF	NC_017627_00068	CP009167	0.0586096
8	novel_0	Contig_9_203.936	5764	Incomplete	IncFII,IncFIIA	000121__CP024805,000136__AP014877_00014			AB024946	0.12827
10	novel_1	Contig_102_184.083	2751	Incomplete	IncFIA	000093__KX023259_00112			CP022226	0.12827
2	novel_1	Contig_10_100.58	71172	Incomplete			MOBP	NC_011416_00039	EF536825	0.197292
3	novel_1	Contig_45_156.963	1186	Incomplete			MOBP	NC_011416_00039	CP011496	0.0834041		IS3	1020	22	1206
3	novel_1	Contig_30_147.829	52103	Incomplete	IncFII,IncFIIA	000121__CP024805,000136__AP014877_00014			CP011496	0.0834041
6	novel_1	Contig_151_92.3535	31981	Incomplete			MOBP	NC_011416_00039	EF536825	0.182269
77C	novel_1	Contig_55_141.417	45487	Incomplete	IncFII,IncFIIA	000121__CP024805,000136__AP014877_00014			CP001162	0.126974
8	novel_1	Contig_21_77.0905	89995	Incomplete			MOBP	NC_011416_00039	CP010207	0.130979

## Sheet: Sheet1
Isolate	Isolate location	Source	ST					Isolate	Isolate location	Source	ST
1	Victoria	VICT1	3476					E. coli 21A	North Queensland	NQLD1	714
2	Victoria	VICT2	642					E. coli 21B	North Queensland	NQLD1	714
3	Victoria	VICT3	10					E. coli 69C	Victoria	VICT7	472
4	Victoria	VICT4	10					E. coli 19A	North Queensland	NQLD1	685
5	Victoria	VICT5	10			phylogeny layout >		E. coli 55C	Victoria	VICT6	4429
6	South Queensland	SQLD2	21					E. coli 46B	Victoria	VICT6	4429
7	South Queensland	SQLD3	1123					E. coli 55B	Victoria	VICT6	4429
8	South Queensland	SQLD4	162					E. coli 1	Victoria	VICT1	3476
9	South Queensland	SQLD5	10					E. coli 9	South Queensland	SQLD5	10
10	South Queensland	SQLD6	-					E. coli 111A	South Queensland	SQLD7	10
19A	North Queensland	NQLD1	685					E. coli 111B	South Queensland	SQLD7	10
20A	North Queensland	NQLD1	10					E. coli K-12 (MG1655)	Reference ingroup	-	10
20B	North Queensland	NQLD1	10					E. coli 20A	North Queensland	NQLD1	10
21A	North Queensland	NQLD1	714					E. coli 20B	North Queensland	NQLD1	10					,
21B	North Queensland	NQLD1	714					E. coli 10	South Queensland	SQLD6	-
46B	Victoria	VICT6	4429					E. coli 3	Victoria	VICT3	10
55B	Victoria	VICT6	4429					E. coli 5	Victoria	VICT5	10
55C	Victoria	VICT6	4429					E. coli 4	Victoria	VICT4	10
69C	Victoria	VICT7	472					E. coli 77C	Victoria	VICT8	410
77C	Victoria	VICT8	410					E. coli 6	South Queensland	SQLD2	21
111A	South Queensland	SQLD7	10					E. coli 143B	South Queensland	SQLD8	154
111B	South Queensland	SQLD7	10					E. coli 7	South Queensland	SQLD3	1123
115C	South Queensland	SQLD7	6445					E. coli 8	South Queensland	SQLD4	162
143B	South Queensland	SQLD8	154					E. coli 2	Victoria	VICT2	642
								E. coli 115C	South Queensland	SQLD7	6445
								E. fergusonii ATCC 35469	Reference outgroup	-	-

## Sheet: Plasmid_accession_reference
Plasmid name	Accession
pB171	CP012922
F-plasmid-K12	MF370216
p2457TS2	CP021680
pRK100	CP011418
pColG	CP012928
MccC7-H22	CP010120
pBS512_7	EF536825
pVir68	AY230888
pAm08CD9902	CP011496
pPAB19-3	AY028316
pSH146_87	CP009103
pO145-13514	CP006028
pSTY1	CP019897
p1303_109	AP001918
p1303_5	KM396298
pECC-1470_100	CP001162
pSYM6	AB024946
pKUSR18	CP010207
pYU39_89	CP022226
pCFSAN029787_02	CP018986
F-plasmid-NCM3722	CP011430
pSA02DT10168701_37	CP009167
p12-4374_62	CP009169
pCFSAN004177G_03	CP012494
pCFSAN004177P_01	GQ149344
pC3-A	JN985534
pM11-A	CP022158
pM11-B	CP010208
pSAN2-1677	KM107842
pECAZ146_5	CP022155
pEC-AR_0162	CP022495
pABWA45_1	CP001061
pABWA45_4	JX445149
pSE-SA20035215	DQ286390
pOX38-Gen	CP012496
pNDM4_WCHEC96200	CP010345
